# Supplementary material
Source: publisher figshare collection journal article supplement (https://acs.figshare.com/ndownloader/files/8855047)
Supplement: Supplementary file 1 [file 8855047]

# A Theoretical Method for an Accurate Elucidation of Energy Transfer Pathways in Europium(III) Complexes with Dipyridophenazine (dppz) Ligand. One more step in the Study of Molecular Antenna Effect.

María J. Beltrán-Leiva<sup>a</sup>, Plinio Cantero-López<sup>a</sup>, César Zúñiga<sup>b</sup>, Ana Bulhões-Figueira<sup>c</sup>,

Dayán Páez-Hernández<sup>a,b\*</sup>, Ramiro Arratia-Pérez<sup>a,b\*</sup>

[dayan.paez@unab.cl](mailto:dayan.paez@unab.cl), [rarratia@unab.cl](mailto:rarratia@unab.cl)

<sup>a</sup> Relativistic Molecular Physics (ReMoPh) Group, Ph.D. Program in Molecular Physical Chemistry, Universidad Andrés Bello, Av. República 275, Santiago 8370146, Chile. Tel/Fax: +56-2-2770-3352

<sup>b</sup> Centro de Nanociencias Aplicadas, Facultad de Ciencias Exactas, Universidad Andrés Bello

<sup>c</sup> Centro Universitário Estácio de Ribeirão Preto, Rua Abrahão Issa Halach, 980 - Ribeirânia, Ribeirão Preto - SP, 14096-160, Brazil.

## Supporting Information

### Contents

|                                                                                                                                                                                                          |     |
|----------------------------------------------------------------------------------------------------------------------------------------------------------------------------------------------------------|-----|
| 1. Structural Parameters .....                                                                                                                                                                           | S3  |
| Table S1.1. Bond lengths for [Eu(NO <sub>3</sub> ) <sub>3</sub> (dppz)] and [Eu(NO <sub>3</sub> ) <sub>3</sub> (H <sub>2</sub> O) <sub>2</sub> (dppz)] complexes.                                        | S4  |
| Table S1.2. Bond lengths for [Eu(NO <sub>3</sub> ) <sub>3</sub> (dppz-CN)] and [Eu(NO <sub>3</sub> ) <sub>3</sub> (H <sub>2</sub> O) <sub>2</sub> (dppz-CN)] complexes. ....                             | S5  |
| Table S1.3. Bond lengths for [Eu(NO <sub>3</sub> ) <sub>3</sub> (dppz-NO <sub>2</sub> )] and [Eu(NO <sub>3</sub> ) <sub>3</sub> (H <sub>2</sub> O) <sub>2</sub> (dppz-NO <sub>2</sub> )] complexes. .... | S6  |
| 2. TD-DFT Calculations.....                                                                                                                                                                              | S7  |
| Table S2.1. Most relevant electronic transitions for dppz ligand.....                                                                                                                                    | S7  |
| Table S2.2. Molecular Orbitals involved in the electronic transitions for dppz ligand.....                                                                                                               | S8  |
| Table S2.3. Most important electronic transitions for dppz ligand with dichloromethane. ....                                                                                                             | S10 |
| Table S2.4. Molecular Orbitals involved in the electronic transitions for dppz ligand with dichloromethane. ....                                                                                         | S11 |

|                                                                                                                                                                                                 |            |
|-------------------------------------------------------------------------------------------------------------------------------------------------------------------------------------------------|------------|
| <b>Table S2.5.</b> Most important electronic transitions for dppz - CN ligand.....                                                                                                              | <b>S12</b> |
| <b>Table S2.6.</b> Molecular Orbitals involved in the electronic transitions for dppz -CN ligand.<br>.....                                                                                      | <b>S13</b> |
| <b>Table S2.7.</b> Most important electronic transitions for dppz - CN ligand with<br>dichloromethane. ....                                                                                     | <b>S15</b> |
| <b>Table S2.8.</b> Molecular Orbitals involved in the electronic transitions for dppz-CN ligand<br>with dichloromethane.....                                                                    | <b>S16</b> |
| <b>Table S2.9.</b> Most important electronic transitions for dppz - NO <sub>2</sub> ligand. ....                                                                                                | <b>S17</b> |
| <b>Table S2.10.</b> Molecular Orbitals involved in the electronic transitions for dppz- NO <sub>2</sub><br>ligand. ....                                                                         | <b>S18</b> |
| <b>Table S2.11.</b> Most important electronic transitions for dppz - NO <sub>2</sub> ligand with<br>dichloromethane. ....                                                                       | <b>S19</b> |
| <b>Table S2.12.</b> Molecular Orbitals involved in the electronic transitions for dppz - NO <sub>2</sub> with<br>dichloromethane. ....                                                          | <b>S20</b> |
| <b>3. Spin orbit energies for the low-lying states in the europium fragment.....</b>                                                                                                            | <b>S21</b> |
| <b>Table S3.</b> SO-CASPT2 energies for the Eu <sup>III</sup> fragments.....                                                                                                                    | <b>S21</b> |
| <b>4. Experimental Section.....</b>                                                                                                                                                             | <b>S23</b> |
| <b>Figure S1.</b> Top: experimental X-ray diffraction diagrams of the powders obtained with<br>[Eu(NO <sub>3</sub> ) <sub>3</sub> (dppz-CN)].....                                               | <b>S25</b> |
| <b>Figure S2.</b> Top: experimental X-ray diffraction diagrams of the powders obtained with<br>[Eu(NO <sub>3</sub> ) <sub>3</sub> (dppz-NO <sub>2</sub> )] .....                                | <b>S25</b> |
| <b>Figure S3.</b> Proton and carbon numbering for the NMR signals of the dppz-CN ligand..                                                                                                       | <b>S26</b> |
| <b>Figure S4.</b> Proton and carbon numbering for the NMR signals of the dppz-NO <sub>2</sub> ligand                                                                                            | <b>S27</b> |
| <b>Figure S5.</b> <sup>1</sup> H NMR spectrum of the dppz-CN ligand.....                                                                                                                        | <b>S28</b> |
| <b>Figure S6.</b> <sup>1</sup> H NMR spectrum of the dppz-NO <sub>2</sub> ligand. ....                                                                                                          | <b>S28</b> |
| <b>Figure S7.</b> Decaying of the luminescence of the emitting <sup>5</sup> D <sub>0</sub> Eu <sup>III</sup> state of the [Eu(NO <sub>3</sub> ) <sub>3</sub><br>(dppz-CN)]. ....                | <b>S29</b> |
| <b>Figure S8.</b> Decaying of the luminescence of the emitting <sup>5</sup> D <sub>0</sub> Eu <sup>III</sup> state of the [Eu(NO <sub>3</sub> ) <sub>3</sub><br>(dppz-NO <sub>2</sub> )]......  | <b>S29</b> |
| <b>Figure S9.</b> Film of complex [Eu(NO <sub>3</sub> ) <sub>3</sub> (dppz-NO <sub>2</sub> )] deposited in a round bottom flask,<br>illuminated by a black light (ultraviolet light) lamp ..... | <b>S30</b> |

## 1. Structural Parameters

All structures were optimized employing the ADF package. Scalar relativistic effects were incorporated by means of the ZORA approximation. The BP86 functional was used with the TZ2P basis set. In all cases, frequency analysis were performed after the geometry optimization, where we obtained only positive frequencies indicating that the geometries obtained are in a true minimum. As can be observed, no significant conformational changes were produced between the ground and excited geometries. This is not surprising because all compounds have localized absorption and emission bands. Therefore, if an optimization of the excited and ground states were performed on both, ligands and lanthanide fragments, more pronounced changes on geometries could be noted.

Below, detailed geometrical parameters are presented for all complexes.

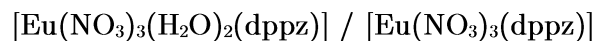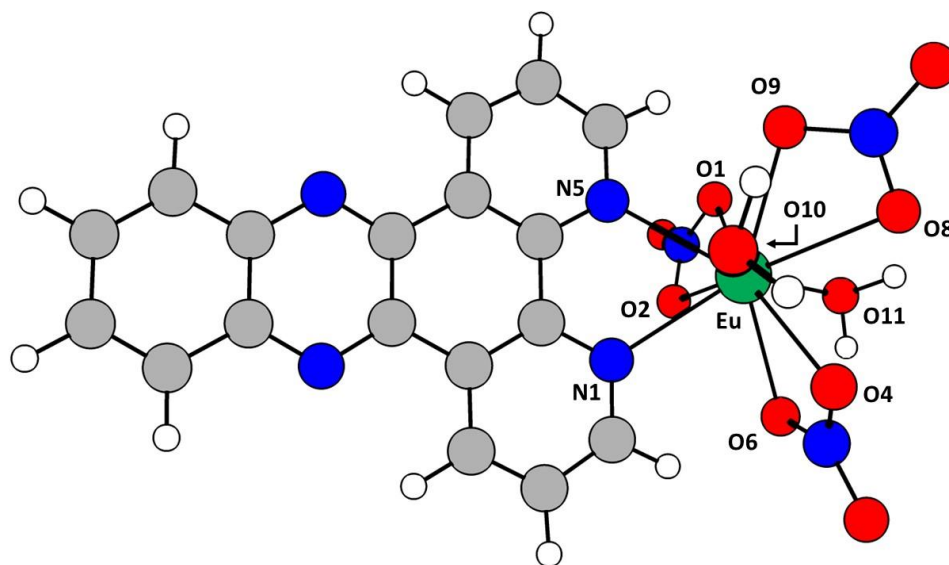

**Table S1.1.** Bond lengths for  $[\text{Eu}(\text{NO}_3)_3(\text{dppz})]$  and  $[\text{Eu}(\text{NO}_3)_3(\text{H}_2\text{O})_2(\text{dppz})]$  complexes. All distances are given in Å.

|                         | $[\text{Eu}(\text{NO}_3)_3(\text{H}_2\text{O})_2(\text{dppz})]$ |         | $[\text{Eu}(\text{NO}_3)_3(\text{dppz})]$ |         |
|-------------------------|-----------------------------------------------------------------|---------|-------------------------------------------|---------|
|                         | Ground                                                          | Excited | Ground                                    | Excited |
| Eu-N1                   | 2.697                                                           | 2.687   | 2.627                                     | 2.616   |
| Eu-N5                   | 2.649                                                           | 2.653   | 2.645                                     | 2.651   |
| Eu-O1                   | 2.456                                                           | 2.462   | 2.466                                     | 2.473   |
| Eu-O2                   | 2.468                                                           | 2.474   | 2.483                                     | 2.489   |
| Eu-O4                   | 2.511                                                           | 2.503   | 2.464                                     | 2.452   |
| Eu-O6                   | 2.592                                                           | 2.574   | 2.481                                     | 2.457   |
| Eu-O8                   | 2.538                                                           | 2.559   | 2.485                                     | 2.502   |
| Eu-O9                   | 2.541                                                           | 2.519   | 2.470                                     | 2.434   |
| Eu-O10 <sub>(h2o)</sub> | 2.617                                                           | 2.569   | -                                         | -       |
| Eu-O11 <sub>(h2o)</sub> | 2.604                                                           | 2.598   | -                                         | -       |

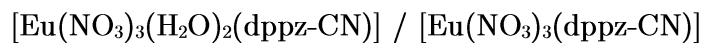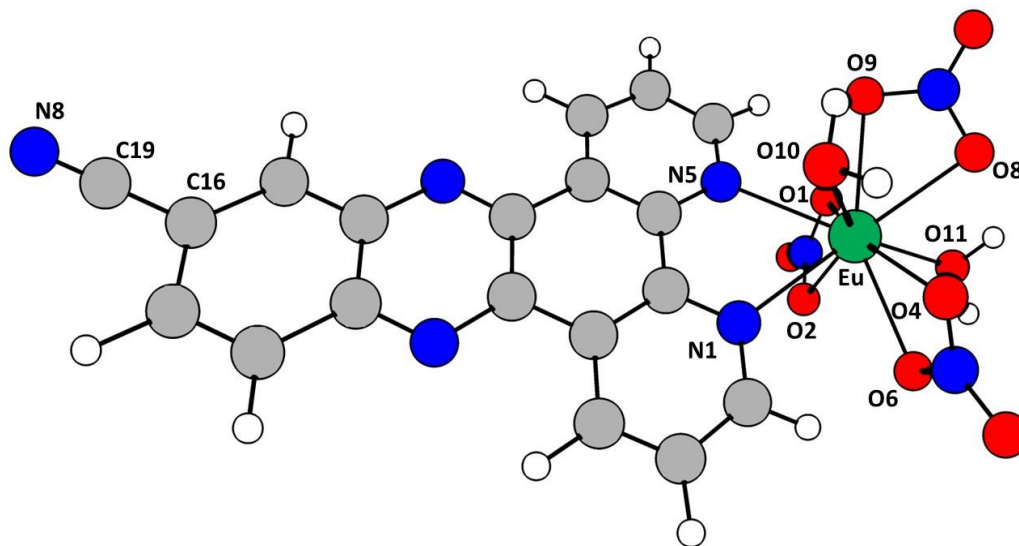

**Table S1.2.** Bond lengths for  $[\text{Eu}(\text{NO}_3)_3(\text{dppz-CN})]$  and  $[\text{Eu}(\text{NO}_3)_3(\text{H}_2\text{O})_2(\text{dppz-CN})]$  complexes. All distances are given in Å.

|                         | $[\text{Eu}(\text{NO}_3)_3(\text{H}_2\text{O})_2(\text{dppz-CN})]$ |         | $[\text{Eu}(\text{NO}_3)_3(\text{dppz-CN})]$ |         |
|-------------------------|--------------------------------------------------------------------|---------|----------------------------------------------|---------|
|                         | Ground                                                             | Excited | Ground                                       | Excited |
| Eu-N1                   | 2.703                                                              | 2.669   | 2.633                                        | 2.570   |
| Eu-N5                   | 2.657                                                              | 2.631   | 2.649                                        | 2.585   |
| Eu-O1                   | 2.450                                                              | 2.457   | 2.463                                        | 2.404   |
| Eu-O2                   | 2.469                                                              | 2.481   | 2.483                                        | 2.453   |
| Eu-O4                   | 2.512                                                              | 2.585   | 2.463                                        | 2.411   |
| Eu-O6                   | 2.588                                                              | 2.487   | 2.479                                        | 2.451   |
| Eu-O8                   | 2.532                                                              | 2.535   | 2.481                                        | 2.443   |
| Eu-O9                   | 2.539                                                              | 2.534   | 2.468                                        | 2.428   |
| Eu-O10 <sub>(h2o)</sub> | 2.620                                                              | 2.592   | -                                            | -       |
| Eu-O11 <sub>(h2o)</sub> | 2.598                                                              | 2.604   | -                                            | -       |
| C19-N8                  | 1.163                                                              | 1.167   | 1.163                                        | 1.167   |
| C16-C19                 | 1.428                                                              | 1.418   | 1.428                                        | 1.417   |

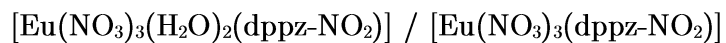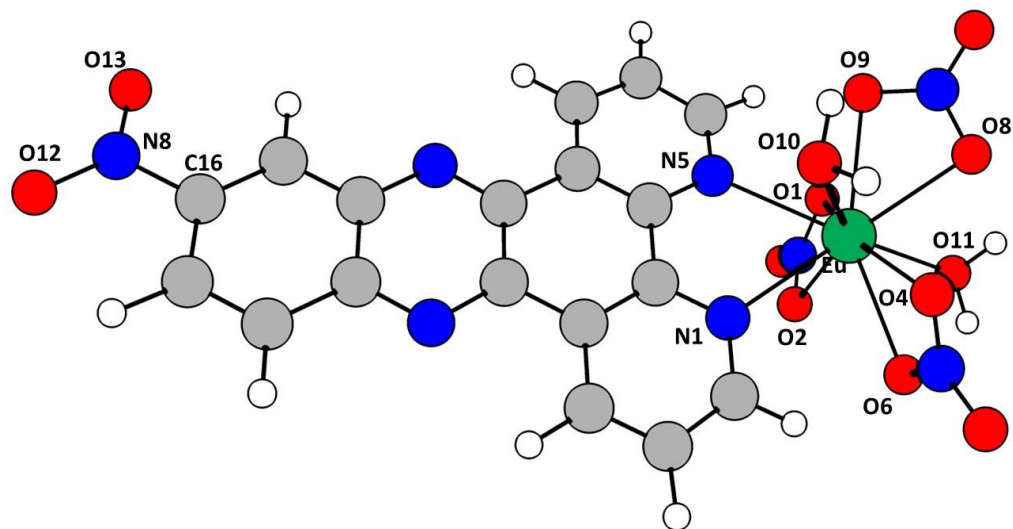

**Table S1.3.** Bond lengths for  $[\text{Eu}(\text{NO}_3)_3(\text{dppz-NO}_2)]$  and  $[\text{Eu}(\text{NO}_3)_3(\text{H}_2\text{O})_2(\text{dppz-NO}_2)]$  complexes. All distances are given in Å.

|                         | $[\text{Eu}(\text{NO}_3)_3(\text{H}_2\text{O})_2(\text{dppz-NO}_2)]$ |         | $[\text{Eu}(\text{NO}_3)_3(\text{dppz-NO}_2)]$ |         |
|-------------------------|----------------------------------------------------------------------|---------|------------------------------------------------|---------|
|                         | Ground                                                               | Excited | Ground                                         | Excited |
| Eu-N1                   | 2.706                                                                | 2.666   | 2.609                                          | 2.569   |
| Eu-N5                   | 2.660                                                                | 2.633   | 2.618                                          | 2.582   |
| Eu-O1                   | 2.450                                                                | 2.458   | 2.419                                          | 2.394   |
| Eu-O2                   | 2.469                                                                | 2.483   | 2.446                                          | 2.451   |
| Eu-O4                   | 2.511                                                                | 2.492   | 2.421                                          | 2.408   |
| Eu-O6                   | 2.586                                                                | 2.581   | 2.441                                          | 2.448   |
| Eu-O8                   | 2.531                                                                | 2.537   | 2.442                                          | 2.441   |
| Eu-O9                   | 2.539                                                                | 2.529   | 2.428                                          | 2.428   |
| N8-O12 <sub>(NO2)</sub> | 1.235                                                                | 1.245   | 1.234                                          | 1.244   |
| N8-O13 <sub>(NO2)</sub> | 1.233                                                                | 1.248   | 1.232                                          | 1.248   |
| C16-N8                  | 1.484                                                                | 1.446   | 1.486                                          | 1.444   |
| Eu-O10 <sub>(h2o)</sub> | 2.620                                                                | 2.588   | -                                              | -       |
| Eu-O11 <sub>(h2o)</sub> | 2.597                                                                | 2.606   | -                                              | -       |

## 2. TD-DFT Calculations

dppz

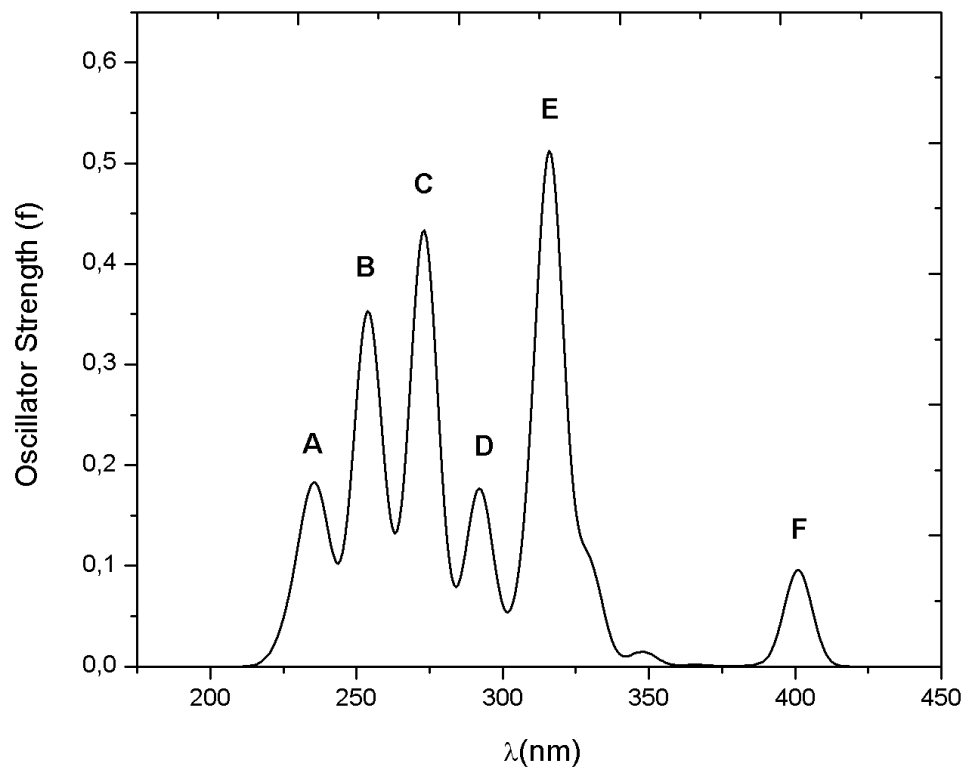

Table S2.1. Most relevant electronic transitions for dppz ligand.

| Band | $\lambda(\text{nm})$ | E(eV) | f       | %    | Origin        | Assignment              |
|------|----------------------|-------|---------|------|---------------|-------------------------|
| A    | 233.6                | 5.31  | 0.103   | 66.5 | HOMO-4→LUMO+5 | $\pi \rightarrow \pi^*$ |
| B    | 253.7                | 4.89  | 0.333   | 42   | HOMO-7→LUMO+1 | $\pi \rightarrow \pi^*$ |
|      |                      |       |         | 35.5 | HOMO-3→LUMO+4 | $\pi \rightarrow \pi^*$ |
| C    | 271.7                | 4.56  | 8.1E-08 | 91.6 | HOMO-2→LUMO+4 | $n \rightarrow \pi^*$   |
| D    | 294.6                | 4.21  | 5.3E-05 | 93.3 | HOMO-1→LUMO+3 | $n \rightarrow \pi^*$   |
|      |                      |       |         | 43.4 | HOMO-3→LUMO+1 | $\pi \rightarrow \pi^*$ |
|      |                      |       |         | 18.2 | HOMO-8→LUMO   | $\pi \rightarrow \pi^*$ |
| E    | 316.1                | 3.92  | 0.493   | 16.9 | HOMO-4→LUMO+2 | $\pi \rightarrow \pi^*$ |
|      |                      |       |         | 73.2 | HOMO-4→LUMO   | $\pi \rightarrow \pi^*$ |
| F    | 400.9                | 3.09  | 0.095   | 73.2 | HOMO-4→LUMO   | $\pi \rightarrow \pi^*$ |

**Table S2.2.** Molecular Orbitals involved in the electronic transitions for dppz ligand. The energy of each molecular orbital is given in eV.

| Band | Origin                                                                                         |                                                                                                 |
|------|------------------------------------------------------------------------------------------------|-------------------------------------------------------------------------------------------------|
| A    | 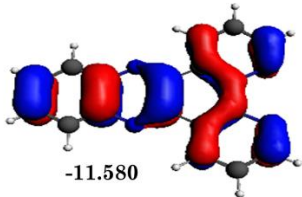<br>-11.580   | <br>-6.443   |
|      | <br>-12.656   | <br>-7.945   |
| B    | <br>-11.325  | <br>-6.686  |
|      | <br>-11.171 | <br>-6.686 |
| C    | <br>-11.045 | <br>-6.865 |
|      | <br>-11.325 | <br>-7.945 |
| D    | <br>-12.909 | <br>-8.852 |
|      |                                                                                                |                                                                                                 |



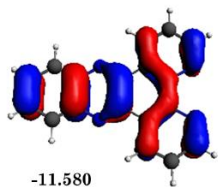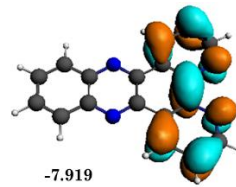

F

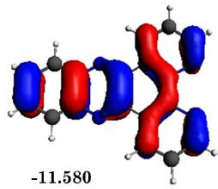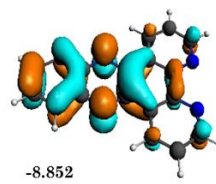

**dppz - Dichloromethane**

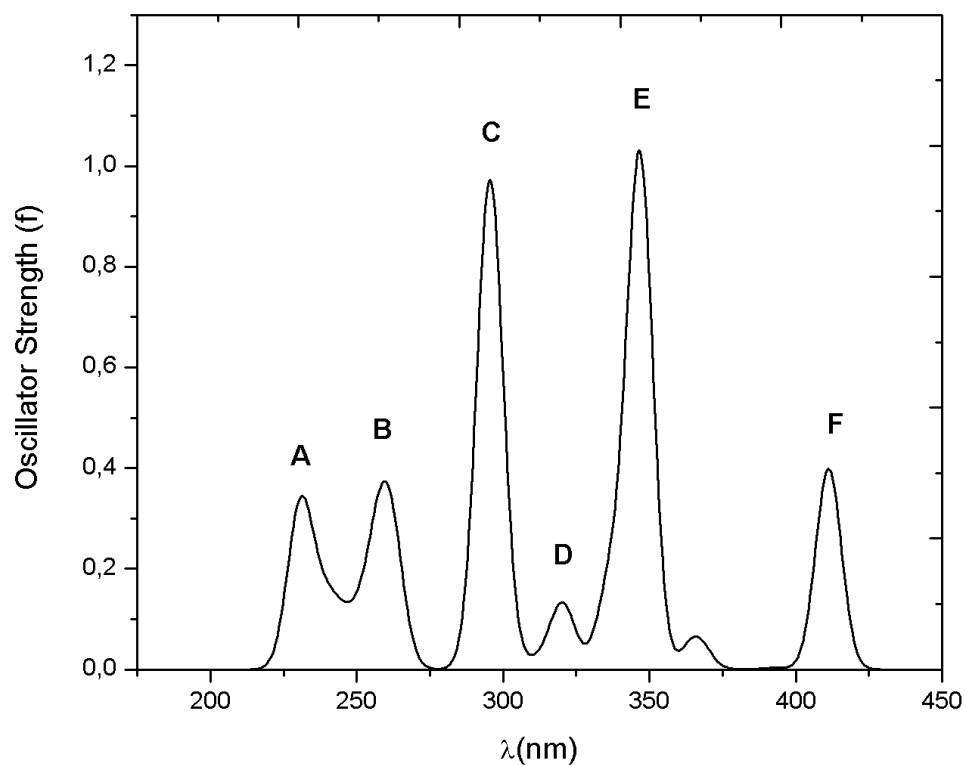

**Table S2.3.** Most important electronic transitions for dppz ligand with dichloromethane.

| Band | $\lambda(\text{nm})$ | $E(\text{eV})$ | f     | %    | Origin        | Assignment              |
|------|----------------------|----------------|-------|------|---------------|-------------------------|
| A    | 231.4                | 5.35           | 0.364 | 34.7 | HOMO-2→LUMO+6 | $\pi \rightarrow \pi^*$ |
|      |                      |                |       | 15.3 | HOMO-7→LUMO+2 | $\pi \rightarrow \pi^*$ |
| B    | 259.6                | 4.76           | 0.379 | 95.4 | HOMO-1→LUMO+5 | $n \rightarrow \pi^*$   |
| C    | 295.7                | 4.19           | 0.896 | 59.2 | HOMO-5→LUMO+1 | $\pi \rightarrow \pi^*$ |
| D    | 320.2                | 3.87           | 0.132 | 81.5 | HOMO-3→LUMO+2 | $\pi \rightarrow \pi^*$ |
| E    | 346.7                | 3.58           | 1.017 | 81.7 | HOMO-2→LUMO+2 | $\pi \rightarrow \pi^*$ |
| F    | 411.2                | 3.02           | 0.398 | 87.5 | HOMO-3→LUMO   | $\pi \rightarrow \pi^*$ |

**Table S2.4.** Molecular Orbitals involved in the electronic transitions for dppz ligand with dichloromethane. The energy of each molecular orbital is given in eV.

| Band | Origin                                                                                         |                                                                                                 |
|------|------------------------------------------------------------------------------------------------|-------------------------------------------------------------------------------------------------|
| A    | 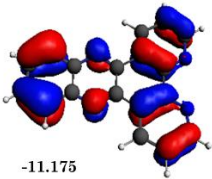<br>-11.175   | <br>-5.955   |
|      | <br>-12.611   | <br>-7.835   |
| B    | <br>-11.063   | <br>-6.305   |
|      | <br>-11.718  | <br>-7.900  |
| D    | <br>-11.441 | <br>-7.835 |
|      | <br>-11.175 | <br>-7.835 |
| F    | <br>-11.441 | <br>-8.707 |

dppz- CN

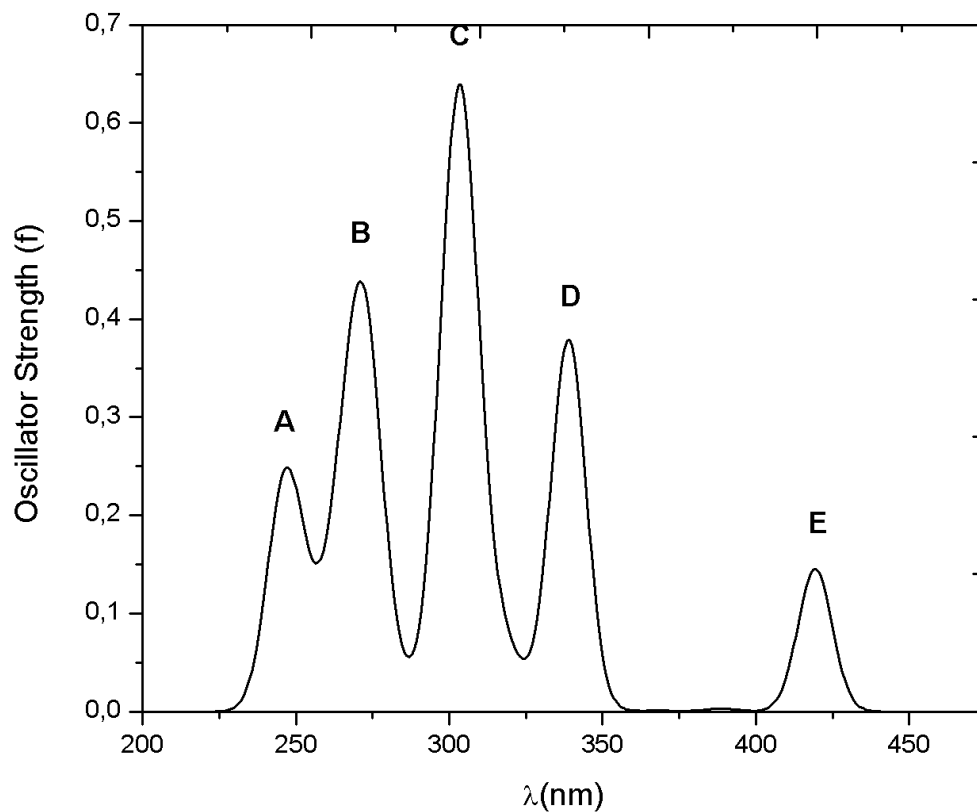

**Table S2.5.** Most important electronic transitions for dppz - CN ligand.

| Band | $\lambda$ (nm) | E(eV) | f        | %    | Origin        | Assignment              |
|------|----------------|-------|----------|------|---------------|-------------------------|
| A    | 249.3          | 4.97  | 0.059    | 46.0 | HOMO-3→LUMO+5 | $\pi \rightarrow \pi^*$ |
|      |                |       |          | 25.3 | HOMO-5→LUMO+2 | $\pi \rightarrow \pi^*$ |
| B    | 272.4          | 4.55  | 0.256    | 16.8 | HOMO-4→LUMO+3 | $\pi \rightarrow \pi^*$ |
|      |                |       |          | 13.4 | HOMO-3→LUMO+4 | $\pi \rightarrow \pi^*$ |
|      |                |       |          | 33.7 | HOMO-4→LUMO+2 | $\pi \rightarrow \pi^*$ |
| C    | 304.2          | 4.08  | 0.317    | 20.7 | HOMO-9→LUMO   | $\pi \rightarrow \pi^*$ |
|      |                |       |          | 10.8 | HOMO-8→LUMO   | $\pi \rightarrow \pi^*$ |
| D    | 339.2          | 3.66  | 0.355    | 52   | HOMO-3→LUMO+1 | $\pi \rightarrow \pi^*$ |
| E    | 419.6          | 2.96  | 0.12E-03 | 62.7 | HOMO→LUMO+2   | $n \rightarrow \pi^*$   |

**Table S2.6.** Molecular Orbitals involved in the electronic transitions for dppz -CN ligand. The energy of each molecular orbital is given in eV.

| Band | Origin                                                                                         |                                                                                                 |
|------|------------------------------------------------------------------------------------------------|-------------------------------------------------------------------------------------------------|
| A    | 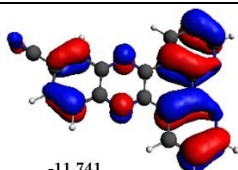<br>-11.741   | <br>-6.862   |
|      | <br>-12.295   | <br>-8.227   |
| B    | <br>-11.984   | <br>-7.642   |
|      | <br>-11.741  | <br>-7.263  |
|      | <br>-11.984 | <br>-8.227 |
|      | <br>-13.218 | <br>-9.387 |
| C    | <br>-13.199 | <br>-9.387 |
|      | <br>-11.741 | <br>-8.461 |
| D    |                                                                                                |                                                                                                 |

---

E

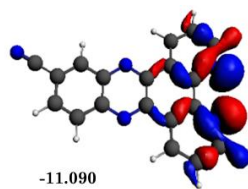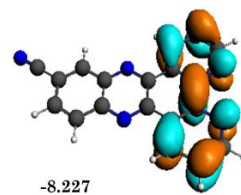

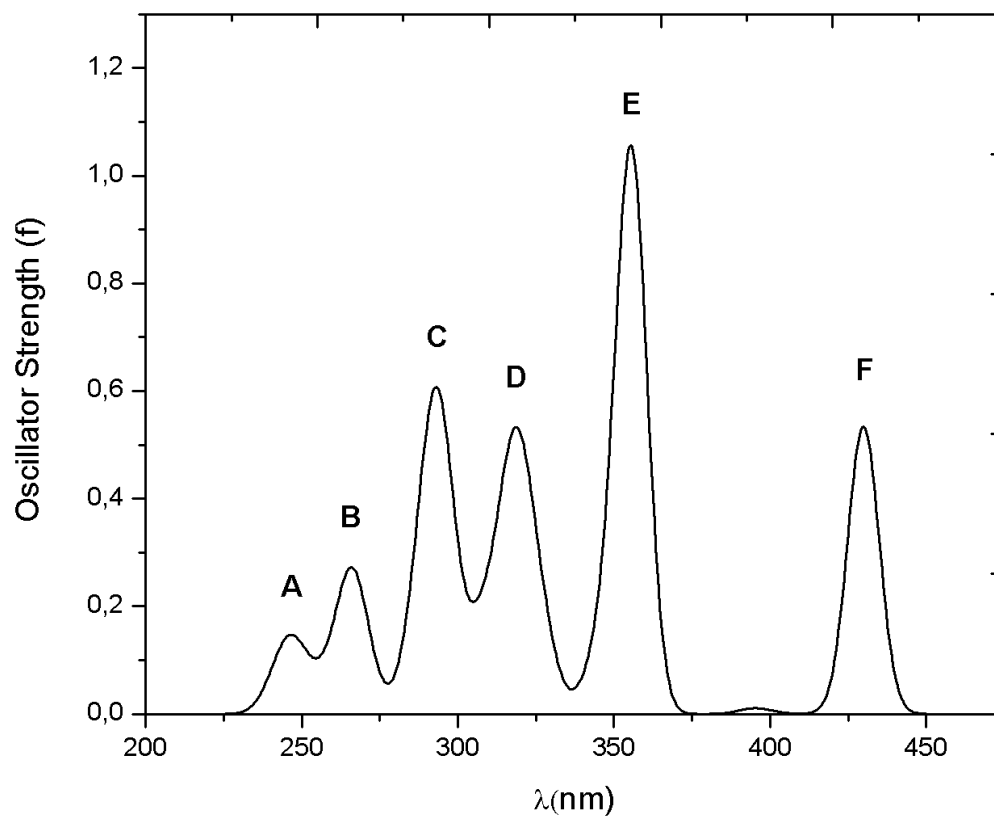

**Table S2.7.** Most important electronic transitions for dppz - CN ligand with dichloromethane.

| Band | $\lambda$ (nm) | E(eV) | f       | %    | Origin        | Assignment              |
|------|----------------|-------|---------|------|---------------|-------------------------|
| A    | 246.9          | 5.02  | 0.03    | 80.3 | HOMO-1→LUMO+6 | $n \rightarrow \pi^*$   |
| B    | 267.4          | 4.64  | 0.1E-03 | 87.0 | HOMO-3→LUMO+4 | $n \rightarrow \pi^*$   |
| C    | 294            | 4.22  | 0.6E-03 | 96.9 | HOMO-3→LUMO+3 | $n \rightarrow \pi^*$   |
| D    | 318.2          | 3.89  | 0.2E-03 | 71.4 | HOMO-1→LUMO+3 | $n \rightarrow \pi^*$   |
| E    | 358.9          | 3.45  | 2.6E-05 | 95.3 | HOMO-3→LUMO+1 | $n \rightarrow \pi^*$   |
| F    | 429.9          | 2.88  | 0.534   | 91.2 | HOMO-4→LUMO   | $\pi \rightarrow \pi^*$ |

**Table S2.8.** Molecular Orbitals involved in the electronic transitions for dppz-CN ligand with dichloromethane. The energy of each molecular orbital is given in eV.

| Band | Origin                                                                                         |                                                                                                 |
|------|------------------------------------------------------------------------------------------------|-------------------------------------------------------------------------------------------------|
| A    | 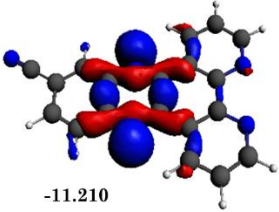<br>-11.210   | <br>-6.199   |
|      |                                                                                                |                                                                                                 |
| B    | <br>-11.566   | <br>-6.906   |
|      |                                                                                                |                                                                                                 |
| C    | <br>-11.566  | <br>-7.381  |
|      |                                                                                                |                                                                                                 |
| D    | <br>-11.210 | <br>-7.381 |
|      |                                                                                                |                                                                                                 |
| E    | <br>-11.566 | <br>-8.142 |
|      |                                                                                                |                                                                                                 |
| F    | <br>-11.671 | <br>-9.053 |
|      |                                                                                                |                                                                                                 |



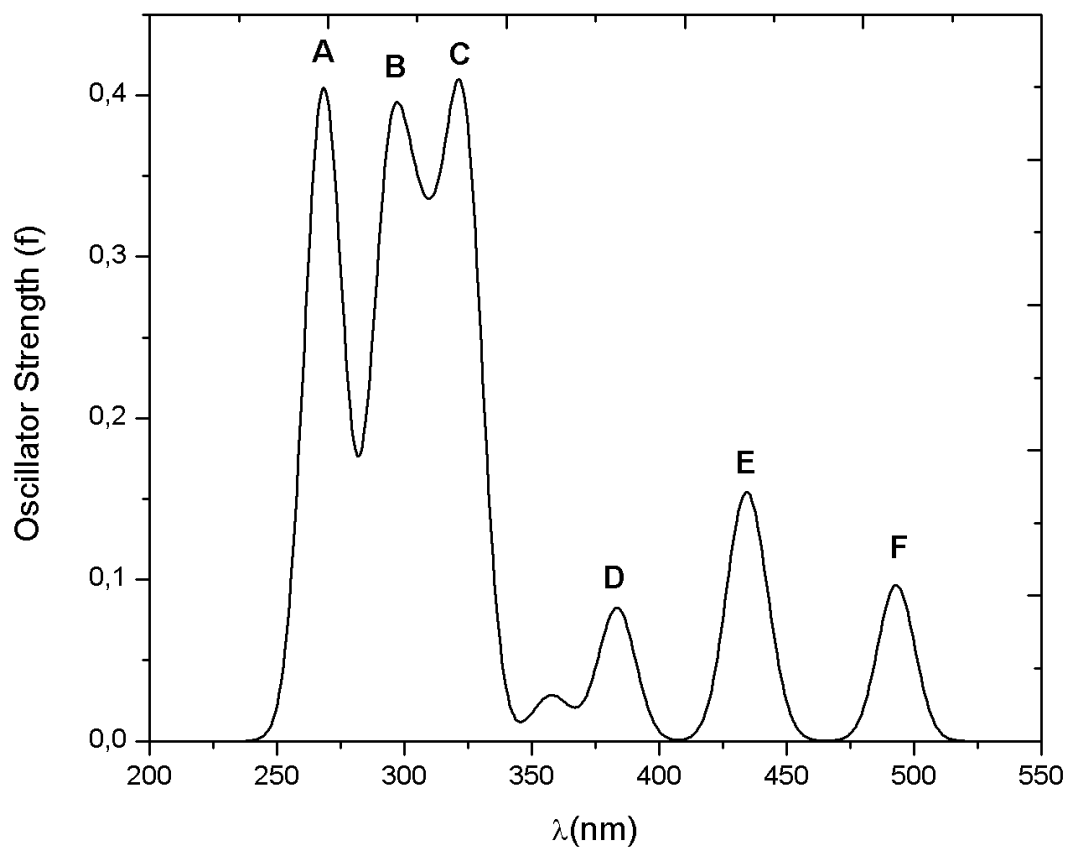

**Table S2.9.** Most important electronic transitions for dppz - NO<sub>2</sub> ligand.

| Band | $\lambda(\text{nm})$ | $E(\text{eV})$ | $f$     | %    | Origin        | Assignment              |
|------|----------------------|----------------|---------|------|---------------|-------------------------|
| A    | 271.9                | 4.56           | 0.1E-03 | 88.9 | HOMO-1→LUMO+5 | $n \rightarrow \pi^*$   |
| B    | 299.8                | 4.14           | 4.6E-06 | 81.3 | HOMO-1→LUMO+4 | $n \rightarrow \pi^*$   |
| C    | 322.7                | 3.84           | 0.316   | 44   | HOMO-3→LUMO+2 | $\pi \rightarrow \pi^*$ |
|      |                      |                |         | 25.4 | HOMO-4→LUMO+3 | $\pi \rightarrow \pi^*$ |
| D    | 383.5                | 3.23           | 0.082   | 74.3 | HOMO-4→LUMO+1 | $\pi \rightarrow \pi^*$ |
| E    | 432.3                | 2.87           | 0.115   | 74   | HOMO-3→LUMO+1 | $\pi \rightarrow \pi^*$ |
| F    | 492.9                | 2.52           | 0.091   | 79.4 | HOMO-4→LUMO   | $\pi \rightarrow \pi^*$ |

**Table S2.10.** Molecular Orbitals involved in the electronic transitions for dppz- NO<sub>2</sub> ligand. The energy of each molecular orbital is given in eV.

| Band | Origin                                                                                         |                                                                                                 |
|------|------------------------------------------------------------------------------------------------|-------------------------------------------------------------------------------------------------|
| A    | 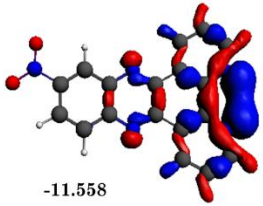<br>-11.558   | <br>-7.072   |
|      |                                                                                                |                                                                                                 |
| B    | <br>-11.558   | <br>-7.436   |
|      |                                                                                                |                                                                                                 |
| C    | <br>-11.878  | <br>-8.379  |
|      | <br>-12.172 | <br>-8.332 |
|      |                                                                                                |                                                                                                 |
|      |                                                                                                |                                                                                                 |
| D    | <br>-12.172 | <br>-9.215 |
|      |                                                                                                |                                                                                                 |
| E    | <br>-11.878 | <br>-9.215 |
|      |                                                                                                |                                                                                                 |
| F    | <br>-12.172 | <br>-9.905 |
|      |                                                                                                |                                                                                                 |

dppz- NO<sub>2</sub> - Dichloromethane

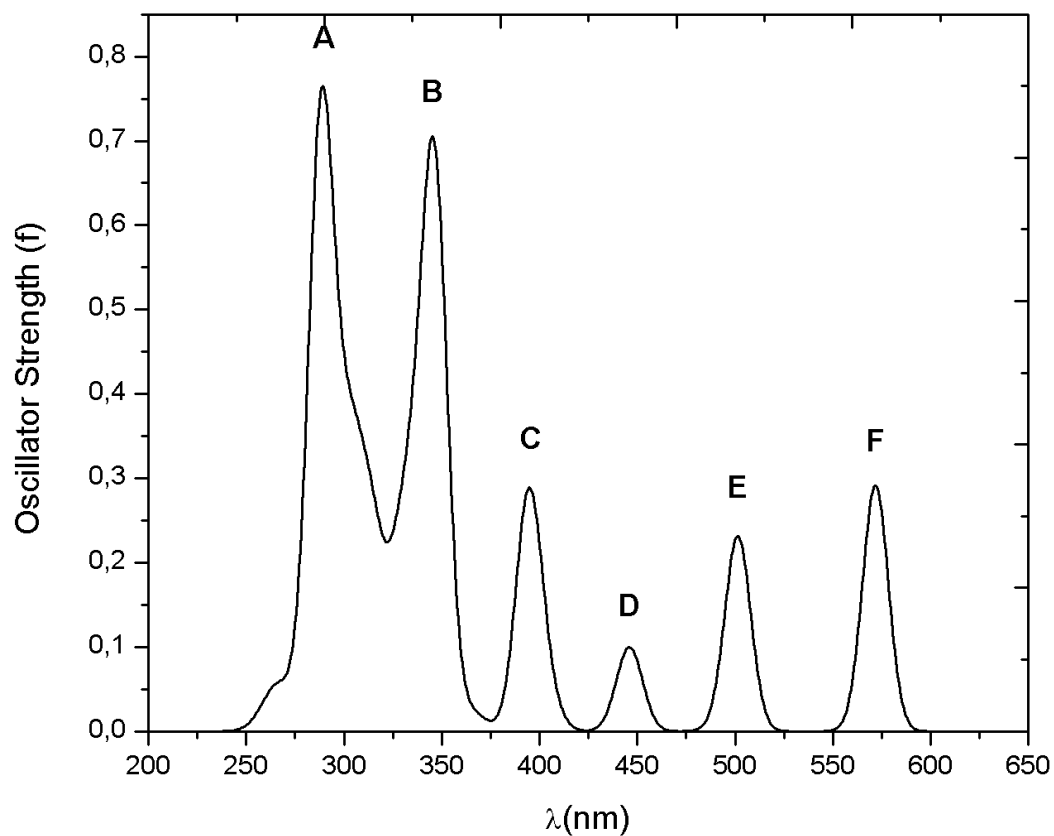

**Table S2.11.** Most important electronic transitions for dppz - NO<sub>2</sub> ligand with dichloromethane.

| Band | $\lambda$ (nm) | E(eV) | f       | %    | Origin        | Assignment              |
|------|----------------|-------|---------|------|---------------|-------------------------|
| A    | 289.9          | 4.28  | 0.02    | 30.3 | HOMO-5→LUMO+3 | $\pi \rightarrow \pi^*$ |
|      |                |       |         | 22.7 | HOMO-8→LUMO+1 | $n \rightarrow \pi^*$   |
| B    | 341.9          | 3.63  | 7.9E-05 | 89   | HOMO-3→LUMO+3 | $\pi \rightarrow \pi^*$ |
| C    | 394.6          | 3.14  | 0.279   | 82.3 | HOMO-4→LUMO+1 | $\pi \rightarrow \pi^*$ |
| D    | 445.9          | 2.78  | 0.099   | 92.4 | HOMO-2→LUMO+1 | $\pi \rightarrow \pi^*$ |
| E    | 501.4          | 2.47  | 0.231   | 90.9 | HOMO-5→LUMO   | $\pi \rightarrow \pi^*$ |
| F    | 571.8          | 2.17  | 0.292   | 93.3 | HOMO-4→LUMO   | $\pi \rightarrow \pi^*$ |

**Table S2.12.** Molecular Orbitals involved in the electronic transitions for dppz - NO<sub>2</sub> with dichloromethane. The energy of each molecular orbital is given in eV.

| Band | Origin                                                                                         |                                                                                                 |
|------|------------------------------------------------------------------------------------------------|-------------------------------------------------------------------------------------------------|
| A    | 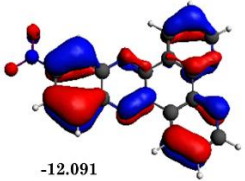<br>-12.091   | <br>-8.028   |
|      | <br>-12.969   | <br>-8.898   |
| B    | <br>-11.614   | <br>-8.028   |
|      | <br>-11.807  | <br>-8.898  |
| C    | <br>-11.502 | <br>-8.898 |
|      | <br>-12.091 | <br>-9.811 |
| D    | <br>-11.807 | <br>-9.811 |
|      |                                                                                                |                                                                                                 |

### 3. Spin orbit energies for the low-lying states in the europium fragment

Table S3. SO-CASPT2 energies for the  $\text{Eu}^{\text{III}}$  fragments. All the energies are given in  $\text{cm}^{-1}$ .

| State | $\text{Eu}(\text{NO}_3)_3$ | $\text{Eu}(\text{NO}_3)_3(\text{H}_2\text{O})_2$ |
|-------|----------------------------|--------------------------------------------------|
| J = 0 | 0.0                        | 0.0                                              |
| J = 1 | 120.6                      | 282.2                                            |
|       | 590.3                      | 459.5                                            |
|       | 718.6                      | 494.2                                            |
| J = 2 | 1214.2                     | 1011.8                                           |
|       | 1272.7                     | 1033.2                                           |
|       | 1372.3                     | 1084.9                                           |
|       | 1400.8                     | 1254.0                                           |
|       | 1497.0                     | 1346.1                                           |
| J = 3 | 2080.6                     | 2024.7                                           |
|       | 2207.2                     | 2055.2                                           |
|       | 2284.4                     | 2065.6                                           |
|       | 2310.1                     | 2102.4                                           |
|       | 2376.9                     | 2118.9                                           |
|       | 2395.1                     | 2139.6                                           |
|       | 2434.1                     | 2255.9                                           |
| J = 4 | 3136.4                     | 2808.6                                           |
|       | 3158.7                     | 3076.9                                           |
|       | 3267.9                     | 3120.5                                           |
|       | 3425.5                     | 3152.6                                           |
|       | 3435.3                     | 3220.3                                           |
|       | 3490.8                     | 3228.4                                           |
|       | 3518.1                     | 3312.1                                           |
|       | 3540.9                     | 3340.3                                           |
|       | 3554.2                     | 3387.1                                           |
|       | 4018.6                     | 4048.7                                           |
|       | 4043.0                     | 4071.1                                           |
|       | 4332.2                     | 4120.2                                           |
|       | 4344.5                     | 4160.6                                           |
|       | 4547.4                     | 4258.8                                           |

|       |        |        |
|-------|--------|--------|
| J = 5 | 4609.2 | 4306.9 |
|       | 4639.4 | 4370.8 |
|       | 4672.9 | 4390.2 |
|       | 4686.0 | 4408.8 |
|       | 4733.4 | 4410.5 |
|       | 4746.4 | 4444.6 |
| J = 6 | 4773.6 | 5022.6 |
|       | 4796.2 | 5028.9 |
|       | 5332.9 | 5200.0 |
|       | 5338.7 | 5218.7 |
|       | 5534.9 | 5263.2 |
|       | 5550.0 | 5277.4 |
|       | 5678.3 | 5307.7 |
|       | 5709.7 | 5319.2 |
|       | 5775.8 | 5336.9 |
|       | 5826.1 | 5395.3 |
|       | 5845.2 | 5398.4 |
|       | 5935.2 | 5467.0 |
|       | 5936.7 | 5468.0 |

---

## 4. Experimental Section

### General methods and materials

All chemicals were reagent-grade, purchased from Aldrich and used as received unless otherwise specified. NMR spectra were recorded using a Bruker AVANCE 400 spectrometer at 25°C. The samples were dissolved in deuterated dichloromethane, using tetramethylsilane as an internal reference. Aldrich spectroscopic grade or HPLC grade solvents were used for all spectroscopic measurements. Infrared spectra were recorded on a Perkin Elmer FTIR Spectrum Two and an UATR Two accessory was used in measurements of the sample in the solid state. Fluorescence measurements were acquired at room temperature and with solid samples on a spectrometer FLUOROLOG 3 ISA/Jobin-Yvon, equipped with a Hamamatsu R928P photomultiplier and a 450 W xenon lamp (ozone free). Elemental analysis was performed on a Perkin-Elmer model Perkin-Elmer 2400 Series-II elemental analyzer instrument. Mass spectra samples were analyzed with a hybrid LTQ FT (ICR 7T) (ThermoFisher, Bremen, Germany) mass spectrometer. Samples were introduced via a microelectrospray source at a flow rate of 3 mL min<sup>-1</sup>. For X-ray powder diffraction measurements, the samples were pulverized and measured at room temperature in a X-ray diffractometer SHIMADZU, model XRD-6000, with Cu-K $\alpha$  radiation ( $\lambda$ =1.5418 Å), diffraction angle ( $2\theta$ ) varying from 5 to 90° (increment of 0.01°, voltage of 40 kV and current of 30 mA).

Crystal structures cannot be obtained due to poor solubility of the samples. However, elemental analysis, Fourier Transform Infrared (FT-IR) spectroscopy, ultraviolet-visible, absorption (UV-vis) spectroscopy, photoluminescence (PL) studies, mass spectrometry and X-ray studies (powder XRD) confirm the identity of the complexes

studied here. FT-IR study shows the characteristic bands of the ligand and its complexes. The IR spectrum of the dppz-CN ligand shows bands at 3060, 2227 and 1584  $\text{cm}^{-1}$ , which may be assigned to  $\nu(\text{CH aromatic})$ ;  $\nu(\text{C}\equiv\text{N})$ ;  $\nu(\text{C}=\text{N})$ , whereas in dppz-NO<sub>2</sub> the bands is located at 3061  $\nu(\text{CH aromatic})$ , 1522  $\nu(\text{NO}_2)$ , 1343  $\nu(\text{NO}_2)$ . In the Europium complexes, these bands are shifted, indicating that there are a coordination between the ligand and the lanthanide ion. The absorption bands assigned to the coordinated nitrates were observed for both complexes as a group bands at about 1495 (s, NO<sub>3</sub><sup>-</sup>), 1299 (s, NO<sub>3</sub><sup>-</sup>), 1081 (s, NO<sub>3</sub><sup>-</sup>) for dppz-CN and 1491(s, NO<sub>3</sub><sup>-</sup>), 1287 (s, NO<sub>3</sub><sup>-</sup>), 1026 (s, NO<sub>3</sub><sup>-</sup>) for dppz-NO<sub>2</sub>, respectively. Differences between the strongest absorption bands of nitrate group are 196  $\text{cm}^{-1}$  and 204  $\text{cm}^{-1}$ , this separation of the two highest frequencies has been extensively studied in nitrate complexes.<sup>1,2</sup> In general larger separations are an indicator of that coordinated nitrate groups in the complexes are bidentate.

Figures S1 and S2 show the experimental X-ray diffraction powders for Eu<sup>III</sup> complexes and dppz-R ligands obtained in this work. The patterns were analyzed and compared with the crystallographic data JCPDS (Joint Committee on Powder Diffraction Standards) of the International Centre for Diffraction Data, available in the software Crystallographica Search-Match. Typical patterns for free ligands and Eu<sup>III</sup> complexes are shown by the profiles, which clearly indicates that different structures and coordination environments are adopted. Thus, dppz-R ligands could form stable complexes with Eu<sup>III</sup> ion.



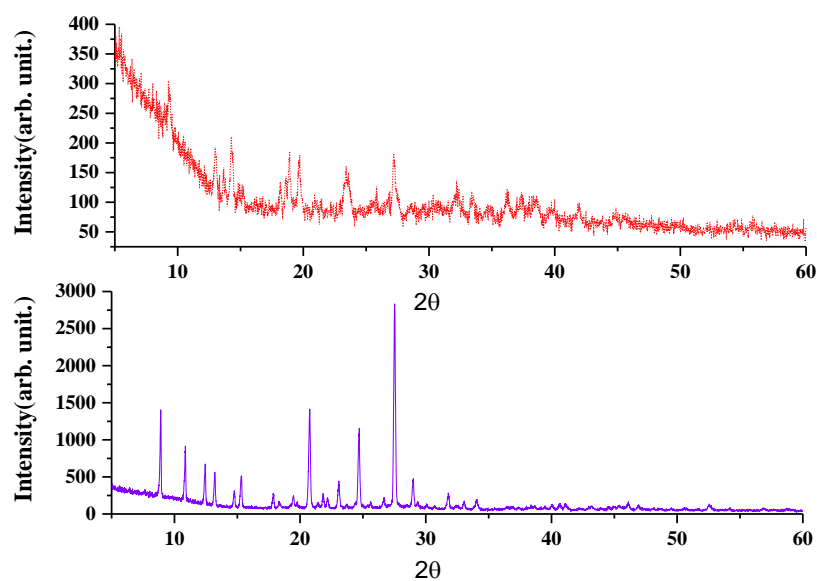

**Figure S1.** Top: experimental X-ray diffraction diagrams of the powders obtained with  $[\text{Eu}(\text{NO}_3)_3(\text{dppz-CN})]$  Bottom: experimental X-ray diffraction powders for dppz-CN.

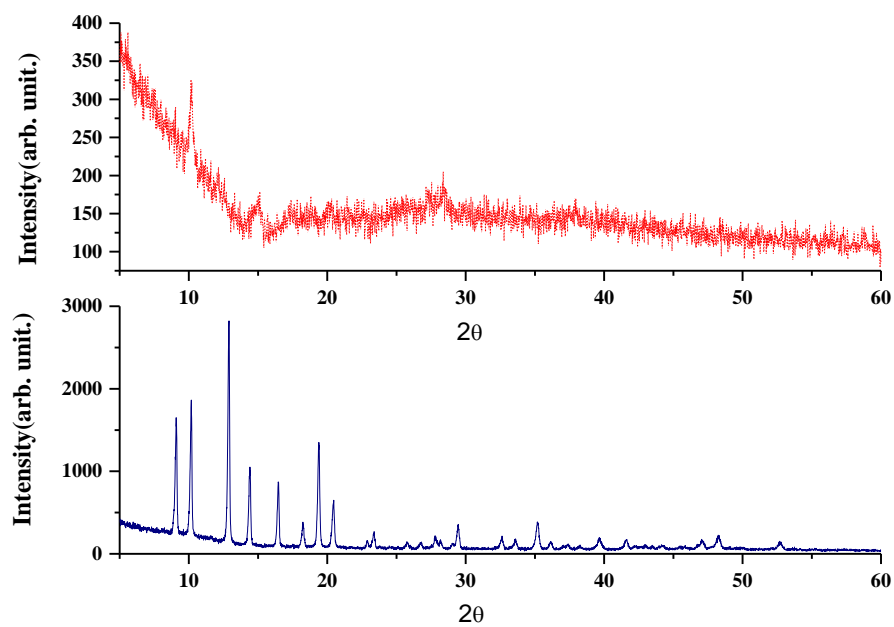

**Figure S2.** Top: experimental X-ray diffraction diagrams of the powders obtained with  $[\text{Eu}(\text{NO}_3)_3(\text{dppz-NO}_2)]$  Bottom: experimental X-ray diffraction powders for dppz- $\text{NO}_2$ .

## Synthesis and characterization

The ligands and complexes prepared in this work, were synthesized following a generalized synthetic procedure<sup>3</sup> which is described below. The ligands were characterized by elemental analysis, infrared (FT-IR) spectroscopy, NMR spectra, and X-ray studies (powder XRD). Additionally to this techniques (except NMR spectra), the synthesized europium complexes were characterized by ultraviolet-visible, absorption (UV-vis) spectroscopy, photoluminescence (PL) studies, mass spectrometry.

### a. Synthesis of 11-cyanodipyrido[2,3-a:2',3'-c]phenazine (dppz-CN)

4.80 mmol of 1,10-phenanthroline-5,6-dione and 4.80 mmol of 3,4-diaminobenzonitrile were dissolved in 80 mL of methanol and the mixture was refluxed for 5 h. The mixture was allowed to cool and the resultant precipitate filtered and washed with MeOH and diethyl ether to give a light red solid that was dried in vacuum. Anal. Calc. for C<sub>19</sub>H<sub>9</sub>N<sub>5</sub>: C, 74.27; H, 2.94; N, 22.79. Found: C, 74.26; H, 2.94; N, 22.84%. IR (cm<sup>-1</sup>): 3060 m(CH aromatic); 2227 m(C≡N); 1584 m(C=N). <sup>1</sup>H NMR (CDCl<sub>3</sub>, 400 MHz,  $\delta$  ppm): 7.68–7.73 (m, 2H, Hc and Hc'); 7.95 (dd, 1H, Ha'); 8.29 (d, 1H, He); 8.57 (d, 1H, Ha); 9.22–9.25 (m, 2H, Hd and Hd'); 9.35–9.42 (m, 2H, Hb and Hb').

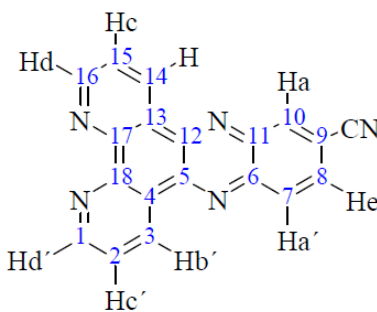

**Figure S3.** Proton and carbon numbering for the NMR signals of the dppz-CN ligand.

### b. Synthesis of 11-nitrodipyrido[ 2,3-a:20,30-c]phenazine (dppz-NO<sub>2</sub>)

1.43 mmol of 1,10-phenanthroline-5,6-dione and 6.53 mmol of 1,2-diamino-4-nitrobenzene were dissolved in 40 mL of dry ethanol and the mixture refluxed for 2h. After cooling, the yellow precipitate was collected by filtration, washed with cold ethanol, and vacuum-dried. Anal. Calc. for C<sub>18</sub>H<sub>9</sub>N<sub>5</sub>O<sub>2</sub>: C, 66.05; H, 2.77; N, 21.39. Found: C, 66.10; H, 2.80; N, 21.74%. IR(cm<sup>-1</sup>): 3061 m(CH aromatic), 1522 v(NO<sub>2</sub>) , 1343 v(NO<sub>2</sub>), <sup>1</sup>H NMR (CDCl<sub>3</sub>, 400 MHz, δ ppm): 9.69–9.67 (m, 2H, Hc and Hc'), 9.39- 9.38 (d ,2H,Ha and Ha'),7.88-7.91(m, 2H, Hb and Hb') 8.68 (d, 1H, He), 9.27- 8.52(m, 2H, Hd and Hd').

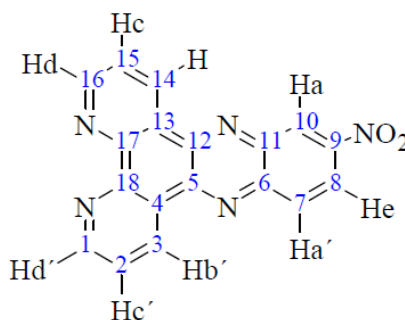

**Figure S4.** Proton and carbon numbering for the NMR signals of the dppz-NO<sub>2</sub> ligand

### c. Characterization of europium [Eu(NO<sub>3</sub>)<sub>3</sub> (dppz-R)] complexes

[Eu(NO<sub>3</sub>)<sub>3</sub>(dppz-CN)] (**2**). Yield (78%).Anal. calc. for C<sub>38</sub>H<sub>18</sub>EuN<sub>13</sub>O<sub>9</sub>. C, 47.91; H, 1.90; N, 19.11. Found: C, 47.95; H, 2.01; N, 19.14. ESI-MS Calcd (found): m/z 954.22 IR (cm<sup>-1</sup>): 3051 m (CH aromatic); 2273 m(C≡N); 1594 (C=N), 1495(s,NO<sub>3</sub><sup>-</sup>), 1299(s,NO<sub>3</sub><sup>-</sup>), 1081(s,NO<sub>3</sub><sup>-</sup>).

[Eu(NO<sub>3</sub>)<sub>3</sub>(dppz-NO<sub>2</sub>)] (**3**). Yield:(75%).Anal. calc. for C<sub>36</sub>H<sub>18</sub>EuN<sub>13</sub>O<sub>13</sub>. C, 43.56; H, 1.82; N, 18.34. Found: C, 43.78; H, 1.90 ; N, 18.75. ESI-MS Calcd (found): m/z 993.45 IR (cm<sup>-1</sup>): 3086 m (CH aromatic); 2284 m(C≡N); 1578 (C=N), 1491(s,NO<sub>3</sub><sup>-</sup>), 1287(s,NO<sub>3</sub><sup>-</sup>), 1026(s,NO<sub>3</sub><sup>-</sup>).

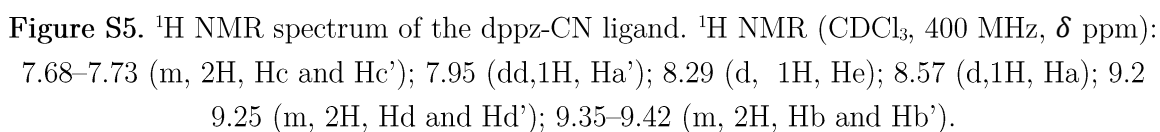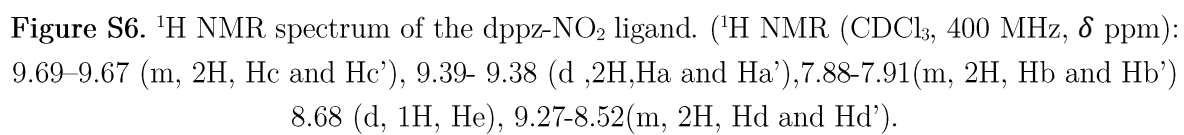

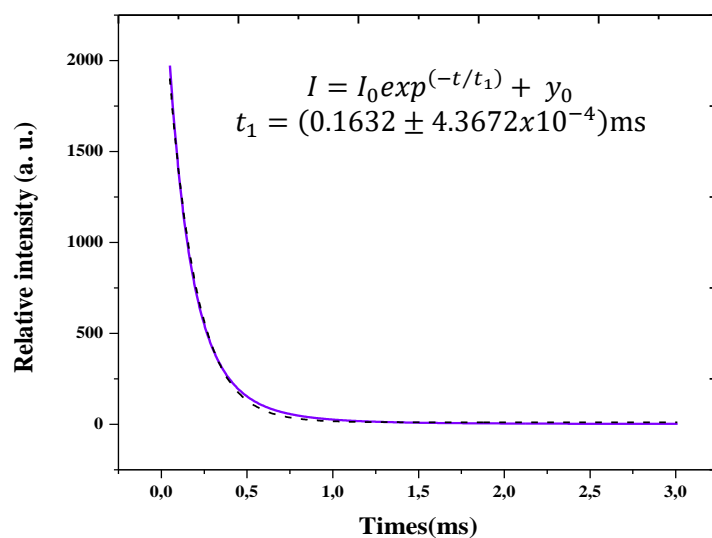

**Figure S7.** Decaying of the luminescence of the emitting  $^5D_0$   $\text{Eu}^{\text{III}}$  state of the  $[\text{Eu}(\text{NO}_3)_3(\text{dppz-CN})]$ . Violet line: data; dashed line: fitting. A single-exponential decaying function fitting ( $R^2 = 0.997$ ) yielded a value of  $\tau = (0.1632 \pm 4.3672 \times 10^{-4})$  ms.

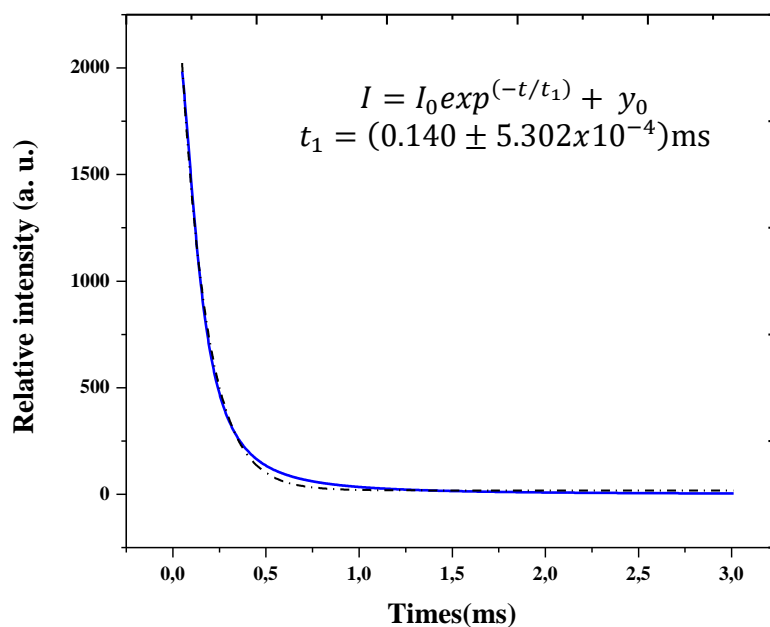

**Figure S8.** Decaying of the luminescence of the emitting  $^5D_0$   $\text{Eu}^{\text{III}}$  state of the  $[\text{Eu}(\text{NO}_3)_3(\text{dppz-NO}_2)]$ . Blue line: data; dashed line: fitting. A single-exponential decaying function fitting ( $R^2 = 0.996$ ) yielded a value of  $\tau = (0.140 \pm 5.302 \times 10^{-4})$  ms.

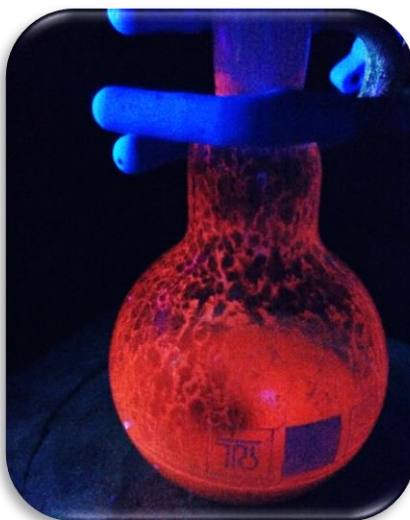

**Figure S9.** Film of complex  $[\text{Eu}(\text{NO}_3)_3 (\text{dppz-NO}_2)]$  deposited in a round bottom flask, illuminated by a black light (ultraviolet light) lamp

### References

- (1) Zhang, Y.; Qin, W.; Liu, W.; Tan, M.; Tang, N. Studies on Synthesis and Infrared and Fluorescence Spectra of New Europium and Terbium Complexes with an Amide-based Open-chain Crown Ether. *Spectrochim. Acta A Mol. Biomol. Spectrosc.* **2002**, *58*, 2153–2157.
- (2) Nakamoto, K. *Infrared and Raman Spectra of Inorganic and Coordination Compounds: Part A: Theory and Applications in Inorganic Chemistry.*; John Wiley & Sons: Marquette University, New Jersey, 2009; p. 432.
- (3) Zúñiga, C.; Crivelli, I.; Loeb, B. Synthesis, Characterization, Spectroscopic and Electrochemical Studies of Donor–acceptor ruthenium(II) Polypyridine Ligand Derivatives with Potential NLO Applications. *Polyhedron* **2015**, *85*, 511–518.
